# Supplementary material
Source: PubMed Central journal article supplement (PMC5338663)
Supplement: supp_pp.16.01729_PP2016-01438DR1_Supplemental_Figure_1.pdf [file supp_pp.16.01729_PP2016-01438DR1_Supplemental_Figure_1.pdf]

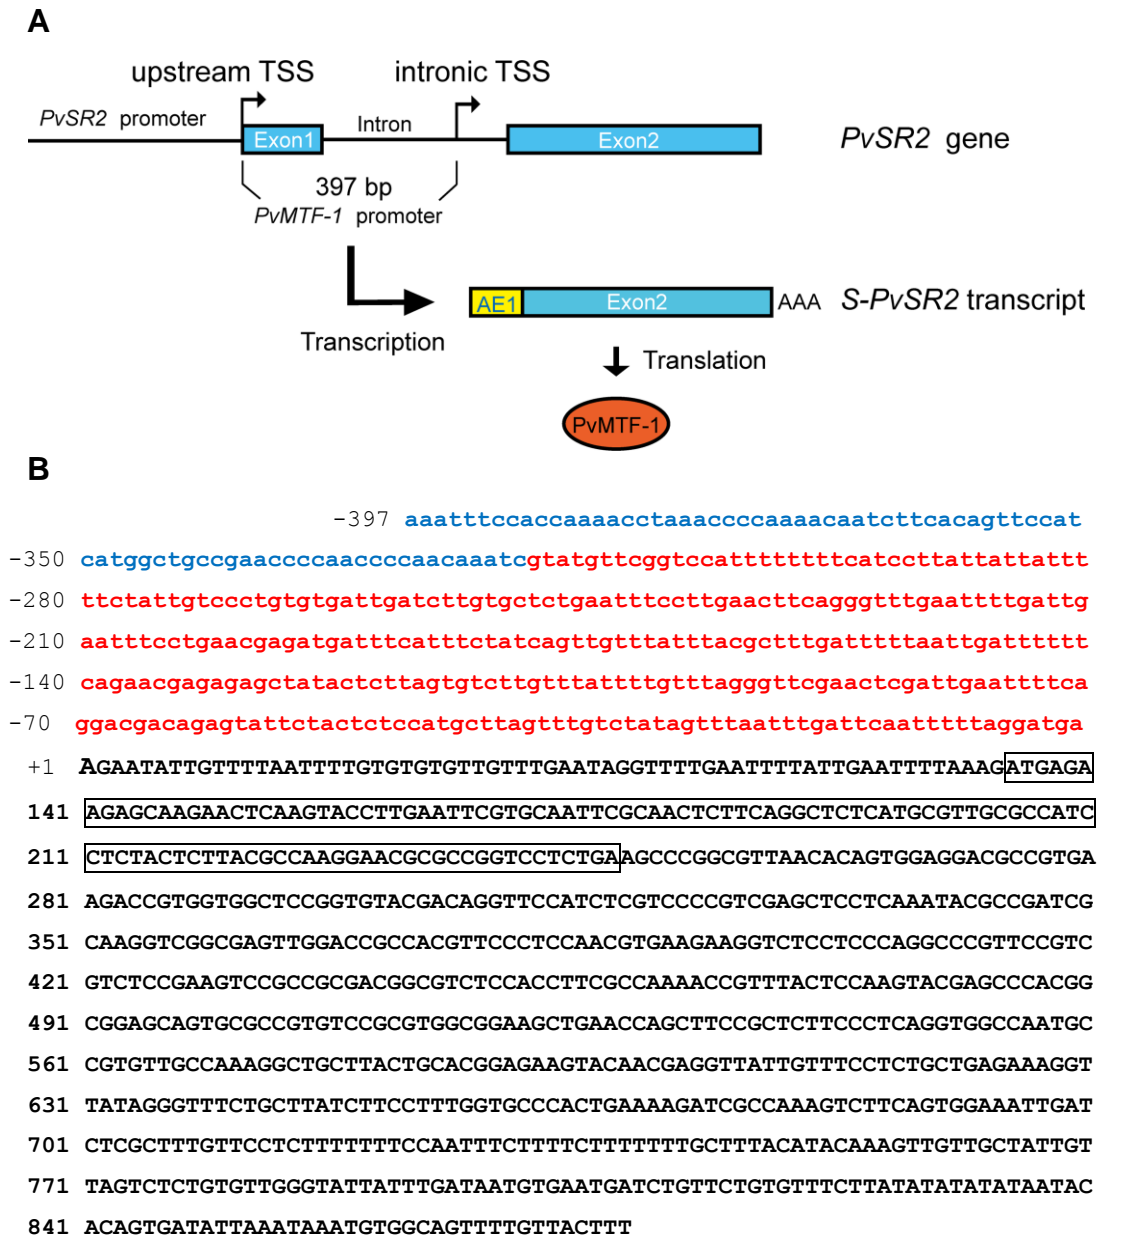

**Figure S1. Schematic representation of *PvMTF-1* gene located within the *PvSR2* locus.**

(A) *PvSR2* contains two transcription start sites (TSSs), *i.e.* the upstream TSS and the intronic TSS. By the use of the intronic TSS, *PvSR2* generates a short *PvSR2* transcript (*S-PvSR2*). *S-PvSR2* excludes the first exon and contains a 126-nt alternative intron fragment as an alternative first exon (AE1). This transcript encodes *PvMTF-1* transcription factor. In this study, we used 397 bp-sized *PvSR2* genomic sequences between the upstream TSS and the intronic TSS as the *PvMTF-1* promoter. (B) The nucleotide sequence (-397/+878) of the *PvMTF-1*. The *PvMTF-1* promoter (lowercase letters) is composed of exon 1 (78 bp, blue letters) and a part of the intron (319 bp, red letters). The intronic TSS is denoted +1. The coding region of *PvMTF-1* is boxed.
