# Supplementary material
Source: PubMed Central journal article supplement (PMC5338663)
Supplement: supp_pp.16.01729_PP2016-01438DR1_Supplemental_Figure_2.pdf [file supp_pp.16.01729_PP2016-01438DR1_Supplemental_Figure_2.pdf]

|                                                               |       |
|---------------------------------------------------------------|-------|
| gttccaagccacaaaaacataataaccacaagcacacgagagaaacagaggtggaagaaa  | 60    |
| gacaacaaaagcaaaacagctgaatttgggtgtctacattgagatccaagagATGGATTTT | 120   |
|                                                               | M D F |
| GATTCATCTTTCTTCCAGTACCAAAGCCTTAACACTCCCTTTCTAAATCTTCTTTGTGT   | 180   |
| D S S F F Q Y Q S L N T P F L N S S L C                       |       |
| GCAGAACCATTCCATTGGGAGGACTTTTTCTTCTCAATGAAGAAAACACCACCACCTT    | 240   |
| A E P F H W E D F F L F N E E N T T T L                       |       |
| GATGATAATCCCTTACCTTCAGTGACCACTCACAATCAAGGAATCATCCTCGGATTCC    | 300   |
| D D N P F T F S D H S Q I K E S S D S                         |       |
| AACTCTCAGGCTCTTTGGTCAGCAGTGAGTCACAGCTGGAAGTGCCTCCAATTTAACT    | 360   |
| N S S G S L V S S E S Q L E V S S N L T                       |       |
| CATGCAAGGCAAGGCCAAGTGTCCAAGAAGCAGATGCATCAGCCCCTCCAAGGAGAGC    | 420   |
| H A R Q G Q V L Q E A D A S A P P K E S                       |       |
| ATCAAAGAGAAGAGACCCTTTAGGGGAGTGAGGAGAAGGCCATGGGGGAAATTTGCTGCT  | 480   |
| <u>I K E K R P F R G V R R R P W G K F A A</u>                |       |
| GAGATAAGAGACTCCACAAGAAATGGGGTTAGAGTGTGGATTGGAACATTTGACACAGCA  | 540   |
| <u>E I R D S T R N G V R V W I G T F D T A</u>                |       |
| GAGGCTGTGCACTGGCCTATGACCAAGCAGCTTTGTCAACAAGAGGTTCCATGGCAGTG   | 600   |
| <u>E A A A L A Y D Q A A L S T R G S M A V</u>                |       |
| CTGAACTCCCAGAAGAAGTGGTGAGGGAATCACTCAAAGACATGGCCAACAAGCCATGG   | 660   |
| <u>L N F P E E V V R E S L K D M A N K P W</u>                |       |
| GAAGATGGTTCCTCACCAGTGTGGCACTCAAGAGGAAACACCCATGAGAAGGAAGTCC    | 720   |
| E D G S S P V L A L K R K H T M R R K S                       |       |
| AAAGCCACAAACAAAAGGCCAAAAGGAGCACCAGTTGGAGAATGTGCTTTCACAAAAT    | 780   |
| K A T N K K A K R E H Q L E N V L S Q N                       |       |
| GTGTTGGTGTGGAGGATTTGGGCTCTGACTACTTGAACAGCTTCTCAGCTTAACTTCT    | 840   |
| V L V L E D L G S D Y L E Q L L S L T S                       |       |
| TCTTCTTCTTCTTCTTCTGATCATTGCTTTGCTtagttaattccttagtttagctcg     | 900   |
| S S S S S S S D H L L C *                                     |       |
| tcaattaatcctgctgttgaatctgttaattaacgttaattctttcatgactttgtact   | 960   |
| agatttgttgttggcatttaggattcggctgccatttttcgcaaaaaaaaaaaaaaaaa   | 1020  |
| aaaaaaaaaa                                                    |       |

**Figure S2 . Nucleotide and deduced amino acid sequences of PvERF15 cDNA.**  
The AP2/ERF domains are underlined.
