# Supplementary material
Source: PubMed Central journal article supplement (PMC5338663)
Supplement: supp_pp.16.01729_PP2016-01438DR1_Supplemental_Table_S1.pdf [file supp_pp.16.01729_PP2016-01438DR1_Supplemental_Table_S1.pdf]

## Supplemental Tables

**Supp. Table 1.** A list of primers used in this study

| Primer Name                 | Primer Sequence (5' to 3')                                                                       |
|-----------------------------|--------------------------------------------------------------------------------------------------|
| <b>Plasmid Construction</b> |                                                                                                  |
| 121-PvERF15-F               | ACGGGGGACTCTAGAGGATCCATGGATTTTGATTCATCTTTC                                                       |
| 121-PvERF15-R               | CGATCGGGGAAATTCGAGCTCCTAGCAAAGCAAATGATCAGA                                                       |
| 1302-PvERF15-F              | CTCTTGACCATGGTAGATCTGGATTTTGATTCATCTTTCTT                                                        |
| 1302-PvERF15-R              | AAGTTCTTCTCCTTTACTAGTGCAAAGCAAATGATCAGAAG                                                        |
| ERF15-sF                    | ACGGGGGACTCTAGAGGATCCATGGATTTTGATTCATCTTTC                                                       |
| ERF15-sR                    | CGGTCCGTACCAGATCTACTAGTGGGTCTCTTCTCTTTGATGC                                                      |
| ERF15-asF                   | CCACTTAAATTATATAGGGGATCCGGGTCTCTTCTCTTTGATGC                                                     |
| ERF15-asR                   | CGATCGGGGAAATTCGAGCTCATGGATTTTGATTCATCTTTC                                                       |
| GA20in-F                    | ACTAGTAGATCTGGTACGGACCG                                                                          |
| GA20in-R                    | GGATCCCCTATATAATTTAAGTGG                                                                         |
| ProPvMTF-1-F                | CCGGAATTCCCAAATTTCCACCAAACCTAA                                                                   |
| ProPvMTF-1-R                | GGACTAGTTCCTAAAAATTGAATCAAATTA AAC                                                               |
| AC-35S-F                    | CCCAAGCTTCTTAAACCCCAAACAATCCCTAAACCCCAAAC<br>AATCGACCCTTCTCTATATAAG                              |
| ACEm-35S-F                  | CCCAAGCTTttTAAAtttAAAAAtAATtttTAAAtttAAAAAtAATtGACCC<br>TTCCTCTATATA (lowercase showed mutation) |
| AC-35S-R                    | GCTCTAGAGTCCCCCGTGTCTCTCCAAATGAAATGAACTTCCT<br>TATATAGAGGAAGGGTCG                                |
| <b>RT-PCR analysis</b>      |                                                                                                  |
| ORF-F                       | ATGGATTTTGATTCATCTTTC                                                                            |
| ORF-R                       | CTAGCAAAGCAAATGATCAGA                                                                            |
| Actin-F                     | CACCGAGGCACCGCTTAATC                                                                             |
| Actin-R                     | CGGCCACTAGCGTAAAGGGAA                                                                            |
| PvERF15-rF                  | TGGCACTCAAGAGGAAACACAC                                                                           |
| PvERF15-rR                  | CATTCTCCA ACTGGTGCTCCC                                                                           |

|                           |                             |
|---------------------------|-----------------------------|
| PvMTF-1-rF                | CTGAAGAGTTGCGAATTGCACGAA    |
| PvMTF-1-rR                | TTGAATTTGATTGAATCTTGCAGGATG |
| <b>ChIP-qPCR analysis</b> |                             |
| P1-F                      | CCAAATTTCCACCAAAACCTAA      |
| P1-R                      | AACTGATAGAAATGAAATCATCTCG   |
| P2-F                      | AACGAGATGATTTCAATTTCTATCAG  |
| P2-R                      | TCCTAAAAATTGAATCAAATTAAC    |
| 3'-UTR-F                  | TCTGCTTATCTTCCTTTGGTGC      |
| 3'-UTR-R                  | CAGAACAGATCATTACATTATCAA    |
